# Supplementary material
Source: publisher figshare collection journal article supplement (https://gsapubs.figshare.com/articles/dataset/_/12532115)
Supplement: Supplementary file 1 [file 1]

## Sheet: Blatt1
Sample no.		OM11-HA - 1A	OM11-HA - 1C	OM11-HA - 1D	OM11-HA - 2B	OM11-HA - 2C	OM11-HA - 2D	OM11-HA - 3A	OM11-HA - 3B	OM11-HA - 3C	OM11-HA - 5A	OM11-HA - 5B	OM11-HA - 5C	OM11-HA - 5D	OM11-HA - 5E	OM11-HA - 5F (dark)	OM11-HA -5F (light)	OM11-HA - 5G	OM11-HA - 5H	OM11-HA - 5K	OM11-HA - 5L	OM11-HA - 5M	OM11-HA - 5N	OM11-HA - 5O	OM11-HA - 5P	OM11-HA - 6B	OM11-HA - 6D	Standard BE-N recommended	Standard BE-N (n=8)	Standard GA recommended	Standard GA (n=8)	JA-2 rec.	JA-2 (n=4)	GH rec.	GH (n=4)
Location		Haylayn Block	Haylayn Block	Haylayn Block	Haylayn Block	Haylayn Block	Haylayn Block	Haylayn Block	Haylayn Block	Haylayn Block	Haylayn Block	Haylayn Block	Haylayn Block	Haylayn Block	Haylayn Block	Haylayn Block	Haylayn Block	Haylayn Block	Haylayn Block	Haylayn Block	Haylayn Block	Haylayn Block	Haylayn Block	Haylayn Block	Haylayn Block	Haylayn Block	Haylayn Block
Latitude °N		23.5733	23.5735	23.5735	23.5731	23.5731	23.5731	23.5728	23.5728	23.5728	23.5422	23.5422	23.5422	23.5422	23.5422	23.5422	23.5422	23.5417	23.5417	23.5417	23.5417	23.5415	23.5415	23.5418	23.5418	23.5655	23.5655
Longitude °E		57.1724	57.1716	57.1716	57.1805	57.1805	57.1805	57.181	57.181	57.181	57.2163	57.2163	57.2163	57.2166	57.2166	57.2168	57.2168	57.2189	57.2189	57.2189	57.2189	57.2176	57.218	57.2191	57.2191	57.1979	57.1979
SiO2	[wt %]	65.29	48.46	72.14	65.3	63.41	76.51	77.12	73.12	72.81	70.66	77.5	69.28	74.67	74.08	73.14	77.29	69.21	72.69	75.69	72.61	74.91	69.17	75.92	78.84	66.33	73.29	38.2	38.5	69.9	70
TiO2	[wt %]	0.3741	0.6762	0.3217	0.3753	0.4116	0.03321	0.03231	0.3664	0.2481	0.4105	0.09637	0.3257	0.1797	0.2432	0.2468	0.03163	0.4543	0.2673	0.1866	0.2416	0.1893	0.5709	0.2034	0.06545	0.6059	0.3475	2.61	2.66	0.38	0.37
Al2O3	[wt %]	13.27	16.65	12.78	14.37	11.74	12.99	12.49	11.14	11.77	11.86	12.56	11.87	12.95	11.87	11.85	12.45	11.31	13.69	12.21	11.42	11.97	10.57	11.84	12.51	13.56	10.66	10.1	9.97	14.5	14.6
Fe2O3 total	[wt %]	4.982	6.713	2.27	5.166	6.268	0.4531	0.2877	3.051	2.7	3.791	0.6625	3.535	1.479	2.487	2.489	0.3127	4.639	1.642	1.776	2.456	1.808	5.084	1.85	0.2747	6.663	3.35	12.8	13	2.83	2.69
MnO	[wt %]	0.1223	0.1868	0.07069	0.1405	0.3023	0.02297	0.01438	0.1336	0.1394	0.1153	0.01162	0.1714	0.04841	0.1168	0.1659	0.01973	0.1692	0.03491	0.08114	0.1471	0.07585	0.165	0.02698	0.00409	0.07712	0.1519	0.2	0.2	0.09	0.09
MgO	[wt %]	3.459	8.011	2.479	3.279	5.186	0.1527	0.1033	2.11	2.934	3.543	0.658	3.726	1.384	2.385	2.674	0.1095	4.515	1.45	1.529	2.742	1.48	5.022	1.896	0.1713	1.347	3.347	13.2	13.1	0.95	0.93
CaO	[wt %]	7.385	12.79	4.617	4.193	5.056	0.5376	0.355	2.539	2.051	4.376	2.399	4.459	3.633	3.584	1.824	0.5363	5.178	7.645	2.528	2.222	2.113	5.364	3.853	5.7	2.046	3.193	13.9	14	2.45	2.44
Na2O	[wt %]	3.354	3.754	3.726	1.82	3.408	3.42	3.496	3.353	3.598	2.609	4.554	2.812	4.268	3.422	2.454	3.671	2.312	1.793	4.417	2.303	2.976	1.66	2.174	1.65	6.506	3.319	3.18	3.15	3.55	3.59
K2O	[wt %]	0.3964	0.2188	0.4393	2.342	2.16	5.539	5.783	2.643	1.982	0.4956	0.8123	1.468	0.311	0.2331	2.91	5.15	0.2286	0.09832	0.2549	3.824	2.93	0.1572	0.6813	0.06792	0.3405	0.3446	1.39	1.4	4.03	4.08
P2O5	[wt %]	0.1121	0.2219	0.1149	0.2388	0.2228	0.01256	0.02056	0.1614	0.1388	0.2188	0.0418	0.1787	0.0959	0.1376	0.1376	0.01402	0.2051	0.1419	0.0877	0.1481	0.0998	0.2586	0.1128	0.0302	0.1428	0.1202	1.05	1.06	0.12	0.12
LOI	[wt %]	1.09	2.09	0.94	2.61	1.63	0.23	0.22	1.24	1.5	1.78	0.6	2.02	0.88	1.32	1.96	0.32	1.64	0.44	1.14	1.75	1.32	1.84	1.33	0.61	2.29	1.76	2.45	2.44	1	0.88
Total	[wt %]	99.8546	99.7746	99.9044	99.8496	99.7947	99.9	99.9185	99.8574	99.8876	99.8655	99.8956	99.8458	99.909	99.9002	99.8513	99.9049	99.8733	99.9003	99.9097	99.8638	99.8834	99.8647	99.8873	99.9237	99.9255	99.89	99.01	99.47	99.8	99.8
V	[ppm]	174	260.9	102.2	194.3	205.1	6.2	7.6	79	73.1	108.4	22	94.8	49	59.6	64.8	10.6	116.7	103.8	51.1	56.1	57.1	143.8	48.9	9.9	27	69.1	235	216	38	51.5
Cr	[ppm]	59.5	151.5	44.2	25.7	115.3	21.7	15.3	38.6	70.3	49.8	31.6	55.5	34.8	53.3	60.2	26.7	83.5	17.9	31.3	42.2	26.1	74	33.4	17.4	20.8	64.7	360	332	12	12.3
Ni	[ppm]	70.7	244.5	55.7	5.6	73.8	6.4		27.8	61.3	94.3	23.4	48.7	14.6	82.2	60.7	9.8	130.3	17.3	34.9	55.3	32.9	138.9	45	14	32.7	99.4	267	272	7	4.03
Cu	[ppm]	123.5			141.9					44.5	12.7			40.7	11.6			2.9	2.4	2.8		10.3	7	1.8		15	17.5
Zn	[ppm]	38.6	43.2	18.3	68.1	86.8	8.7	4	52.6	48.7	36	5.5	58	22.3	35.4	52.4	7.2	53.9	7.6	30.7	44.3	28.6	65.2	8.3	2	22	41.6	120	119	80	55.8
Ga	[ppm]	19.1	13.2	8.6	15.5	8.6	11.2	10	10.9	10.7	13.9	9.9	15.6	11.7	13.8	9.8	11.9	13.9	12	9.2	11.8	9.3	14.2	10.2	8.5	21.6	8.4	17	15.3	16	14.8
Rb (RFA)	[ppm]	18.2	2.8	13.2	98.9	55.9	272.7	325.8	52.9	43.3	16	17.2	30.6	6.8	7.5	64.2	153.5	4.3	2.7	8.5	116	60.1	2.3	21	3.1	1.2	11.4	47	47.7	175	172
Rb (ICPMS)	[ppm]		2.35		91.75			319.75		41.325	13.875			6.7475	6.5925			3.9525	1.5775	7.215		55.45	2.09	18.25		1.4	10.015					68	92.1	390	350
Sr (RFA)	[ppm]	230.7	442.4	188.3	153	123.6	49.9	6	128.1	124.5	213.8	226.5	123.5	242.2	201.5	129.2	34.7	185.1	260.4	202.1	129.4	153	170.9	333	223.1	85.2	115.9	1370	1416	310	299
Sr (ICPMS)	[ppm]		420		159.5			5.285		125.25	239.575			259.5	209.75			198.75	268.5	201.25		152.25	186.25	363.75		83.525	126.25					252	237	10	8.5
Y (RFA)	[ppm]	30.8	52.1	20.3	23.4	52.7	13.6	8.1	36	24.4	25.9	42.4	43.3	19.9	25.9	22.4	47.4	34.6	27.3	16	22	17.1	27.4	16.3	37.1	53.3	29.1	30	30.1	21	18.8
Y (Laser)	[ppm]		35.95		23.525			7.4925		23.725	27.7			20	24.65			34.225	22.875	16.225		16.45	25.175	15.525		49.625	31.15					18.1	13.2	75	79.9
Zr (RFA)	[ppm]	117.9	199.7	97.9	98.7	114.1	36.7	24.6	145.3	100.2	128.6	72.8	100.7	60.8	104.8	100.9	59	105.3	86.7	85.4	99.5	85.9	151	80.1	57.9	182.4	90.6	260	265	150	142
Zr (ICPMS)	[ppm]		144.75		106.25			24.675		108.5	147.225			67.3	105.5			109.5	84.9	92.25		94.225	163	96.2		181.25	104.95					119	91.6	150	175
Nb (RFA)	[ppm]	10	14.3	7	8.1	9.7	5.1	4.4	13	10.2	10.7	26.5	12.4	9.6	11.7	10.1	24.6	10.1	11	9.5	9.4	10.1	9.6	9.5	12.4	4.6	11
Nb ICPMS	ppm		11.225		9.2175			5.8325		12.875	11.9			12.75	12.8			11.65	11.175	10.55		12.05	10.445	11.05		3.0875	13.325					9.8	8.66	85	110
Ba	[ppm]		118		240	265		18.525	264.7	172.75	100.175			59.95	33.525	274.6	111.8	54.125	37.55	60.65	291.9	411.5	30.825	115.25	37.1	29.55	25.75					317	315	20	17.5
La	[ppm]		30.825		23.5			8.7975		25.2	26.425			11.75	25.9			16.9	22.3	31.1		35.2	31.875	34.225		8.445	60.975					16.3	15.6	25	27.4
Ce	[ppm]		60.125		47.7			13.525		50	50.35			21.775	50.325			35.575	43.025	56.65		62.85	62	60.9		19.375	109.5					32.7	31.3	60	59.8
Pr	[ppm]		6.7375		5.2825			1.3575		5.45	5.6425			2.4275	5.49			4.67	4.82	5.8875		6.3775	6.84	6.1275		3.1125	11.45					4.38	3.37	7.8	7.78
Nd	[ppm]		28.25		22.65			4.755		21.95	24.125			10.0325	22.225			22.825	18.75	21.875		23.225	29.05	22.95		17.225	43					13.8	13.3	29	31.4
Sm	[ppm]		6.7025		4.94			1.2625		4.94	5.5225			2.9925	4.9175			6.4575	4.115	4.175		4.0875	6.1475	4.17		5.6525	7.7675					3.12	2.9	9	9.82
Eu	[ppm]		2.2025		1.395			0.31725		1.2025	1.505			1.185	1.0975			1.5875	1.115	0.9355		0.92925	1.5925	1.0475		1.775	1.4875					0.94	0.94	0.12	0.13
Gd	[ppm]		6.1875		4.545			1.14		4.4375	5.375			2.99	4.1925			6.5575	3.7675	3.2525		3.2425	5.4775	3.24		7.065	6.1625					3.11	2.58	9.5	10.4
Tb	[ppm]		1.0855		0.74325			0.217		0.71625	0.88825			0.55975	0.7355			1.13	0.6685	0.52025		0.543	0.86775	0.514		1.3425	0.9755					0.42	0.42	1.9	2.21
Dy	[ppm]		6.7525		4.415			1.2775		4.3675	5.22			3.445	4.4175			6.7875	3.9775	3.06		3.005	5.08	2.9375		8.9525	5.8					3.01	2.44	12	14.6
Ho	[ppm]		1.465		0.88875			0.30975		0.89975	1.05475			0.713	0.89875			1.3625	0.83	0.63425		0.6105	1.01225	0.5935		2.0525	1.17					0.46	0.5	2.9	3.22
Er	[ppm]		3.875		2.395			0.843		2.4025	2.8			1.91	2.39			3.4625	2.25	1.6325		1.645	2.61	1.6325		5.7725	3.1775					1.37	1.47	8	9.47
Tm	[ppm]		0.61025		0.34875			0.13525		0.33675	0.3755			0.301	0.355			0.4805	0.3285	0.23375		0.24525	0.34175	0.2395		0.861	0.46875					0.3	0.21	1.3	1.39
Yb	[ppm]		4.1225		2.35			0.999		2.39	2.6375			2.08	2.62			3.315	2.405	1.8275		1.86	2.48	1.8425		6.35	3.4175					1.67	1.64	8	9.66
Lu	[ppm]		0.56775		0.31675			0.14875		0.331	0.342			0.28975	0.366			0.45175	0.33425	0.258		0.27275	0.31675	0.25975		0.906	0.472					0.27	0.23	1.1	1.35
Hf	[ppm]		3.4025		2.4125			1.1225		2.67	3.2625			2.0775	2.83			2.685	2.31	2.4775		2.54	3.4725	2.6425		5.1875	3.0575					2.89	2.45	6.6	7.83
Ta	[ppm]		0.55575		0.4565			0.92375		0.87225	0.6105			0.969	1.02275			0.68025	0.816	0.76975		0.94725	0.31775	0.77225		0.182	1.325					0.61	0.58	4.8	4.83
Pb	[ppm]	8.6	2.2	5.8	12.4		57.5	60.2		27.6	6.7	13	20.6	12.1	9.3			6.9	3.6	7.9		19.4	4.3			1.5	7.8					2.4	2.37	18	19.1
Th	[ppm]		5.73		5.1075			5.49		10.325	6.2575			7.4025	10.725			4.9725	8.2075	10.825		11.625	3.24	11.125		0.66225	14.6
U	[ppm]		1.625		1.029			1.7825		1.4975	1.1225			2.195	2.41			1.42	2.95	1.585		1.7275	0.5465	2.6775		0.24	4.38
87Sr/86Sr(96Ma)			0.70735		0.707444			0.72319		0.707928				0.707243				0.7074				0.707475	0.707665
143Nd/144Nd(96Ma)			0.512306		0.51224			0.512246		0.512228				0.512209				0.512224				0.51223	0.512245
176Hf/177Hf(96Ma)			0.282905		0.28287			0.282835		0.282831				0.282834				0.282873				0.28282	0.282894
εNd(96Ma)			-4.07		-5.19894			-5.08844		-5.44667				-5.80406				-5.51338				-5.40457	-5.11153
εt Hf (96Ma)			6.88		5.13078			3.9118		3.76306				3.86632				5.23018				3.36726	5.99176
